# Supplementary material for: Characterization of ASR gene and its role in drought tolerance in chickpea (Cicer arietinum L.)
Source: PLOS journal article supplement (doi:10.1371/journal.pone.0234550), 2020-07-14
Supplement: S2 (10.1371/journal.pone.0234550.s002) [file journal.pone.0234550.s002]

## S2 file

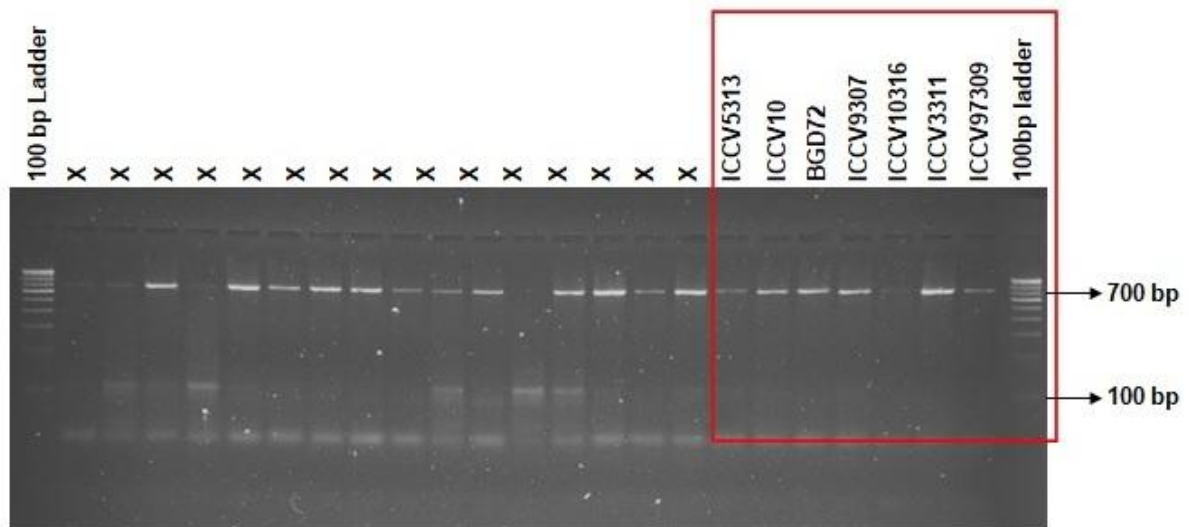

**S3 Raw image. PCR Amplification of seven chickpea genotypes using ASR gene specific marker.** PCR amplification of seven chickpea genotypes *viz.*, ICCV97309, ICCV3311, ICCV10316, ICCV9307, BGD72, ICCV10, and ICCV5313 was done using ASR gene specific primer and revealed a single amplicon ranging from 680-700bp; Marker-100 bp Bangalore Genei DNA ladder.
